# Supplementary material for: The AP-1-BATF and -BATF3 module is essential for growth, survival and TH17/ILC3 skewing of anaplastic large cell lymphoma
Source: PubMed Central journal article supplement — Leukemia. 2018 Mar 28;32(9):1994–2007. doi: 10.1038/s41375-018-0045-9 (PMC6127090; doi:10.1038/s41375-018-0045-9), 2018-03-28
Supplement: 41375_2018_45_MOESM5_ESM.pdf [file 41375_2018_45_MOESM5_ESM.pdf]

## Supplementary Figure 2

**A**

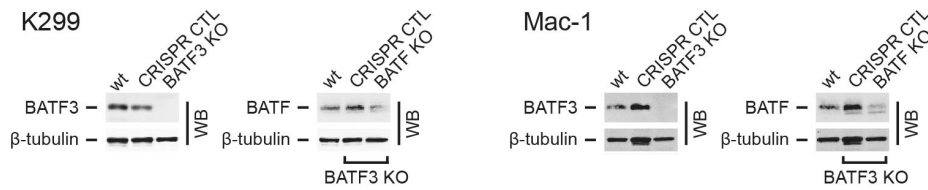

**B**

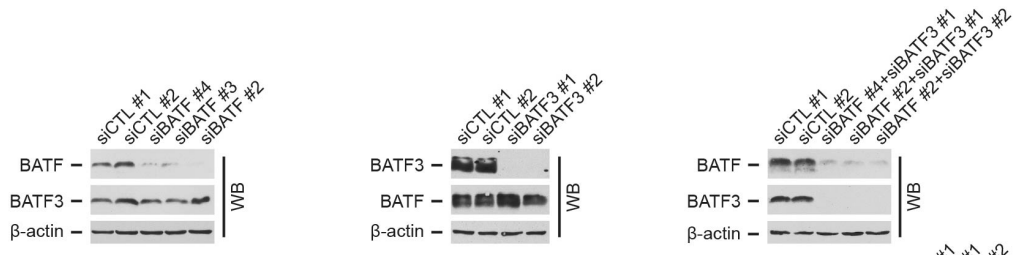

**C**

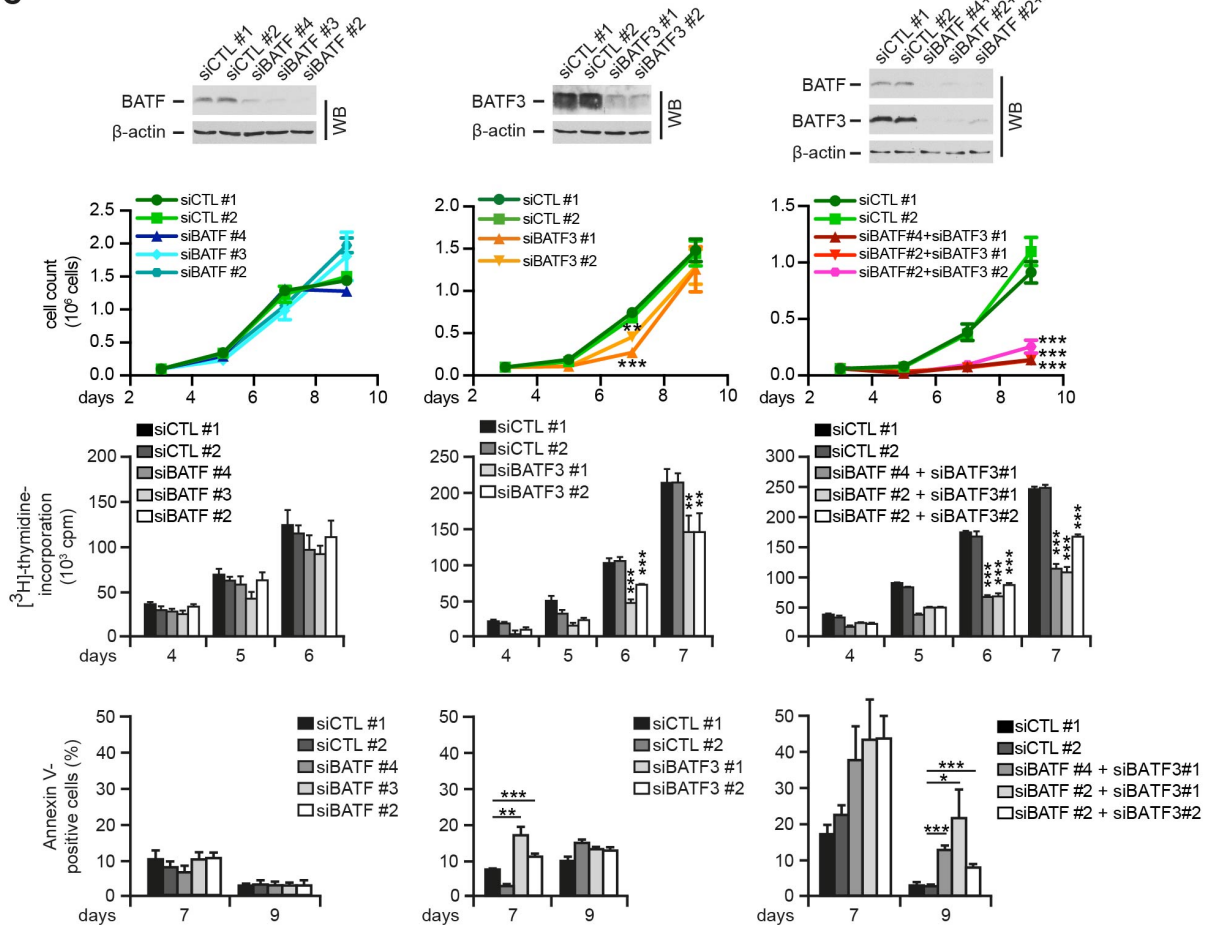

**Supplementary Figure 2.** siRNA-mediated knock-down of BATF and/or BATF3 in ALCL. **(A)** Expression of BATF and BATF3 in K299 (left) and Mac-1 (right) BATF and BATF3 double knock-out cells. Stable BATF3 single knock-out cells were transduced with GFP-labeled vector encoding BATF targeting guide RNA (BATF KO) or non-targeting control (CRISPR CTL). At day 10, GFP-positive cells were enriched by flow cytometry and whole cell extracts were analyzed by WB for protein expression of BATF and BATF3. The analysis of respective extracts from wt cells was included as a control. Furthermore, expression of  $\beta$ -tubulin was analyzed as a control. **(B)** siRNA-mediated knock-down of BATF and/or BATF3 in Mac-1 cells. Mac-1 cells were treated with control siRNAs (siCTL #1 and siCTL #2), siRNAs targeting BATF (siBATF #2, siBATF #3, and siBATF #4; left panels) or BATF3 (siBATF3 #1 and siBATF3 #2; center), or respective combinations (right panels), as indicated. Knock-down of the respective proteins was confirmed by immunoblotting (WB) (top panels). Expression of  $\beta$ -actin was analyzed as a control. **(C)** siRNA-mediated knock-down of BATF and/or BATF3 in K299 cells. K299 cells were treated with control siRNAs (siCTL #1 and siCTL #2), siRNAs targeting BATF (siBATF #2, siBATF #3, and siBATF #4; left panels) or BATF3 (siBATF3 #1 and siBATF3 #2; center), or respective combinations (right panels), as indicated. Knock-down of the respective proteins was confirmed by immunoblotting (WB) (top panels). Thereafter, cell numbers (upper graphs),  $[^3\text{H}]$ -thymidine incorporation (center) and the percentage of Annexin V-positive cells (lower graphs) were analyzed over time. The respective cell number is indicated by  $10^6$  (upper graphs),  $[^3\text{H}]$ -thymidine incorporation by  $10^3$  counts per minute (cpm), Annexin V-positivity in percentage of Annexin V-positive cells (%). \*,  $P < 0.05$ ; \*\*,  $P < 0.01$ ; \*\*\*,  $P < 0.001$ ; n.s., not significant.
