# Supplementary material for: The AP-1-BATF and -BATF3 module is essential for growth, survival and TH17/ILC3 skewing of anaplastic large cell lymphoma
Source: PubMed Central journal article supplement — Leukemia. 2018 Mar 28;32(9):1994–2007. doi: 10.1038/s41375-018-0045-9 (PMC6127090; doi:10.1038/s41375-018-0045-9), 2018-03-28
Supplement: 41375_2018_45_MOESM7_ESM.pdf [file 41375_2018_45_MOESM7_ESM.pdf]

## Supplementary Figure 4

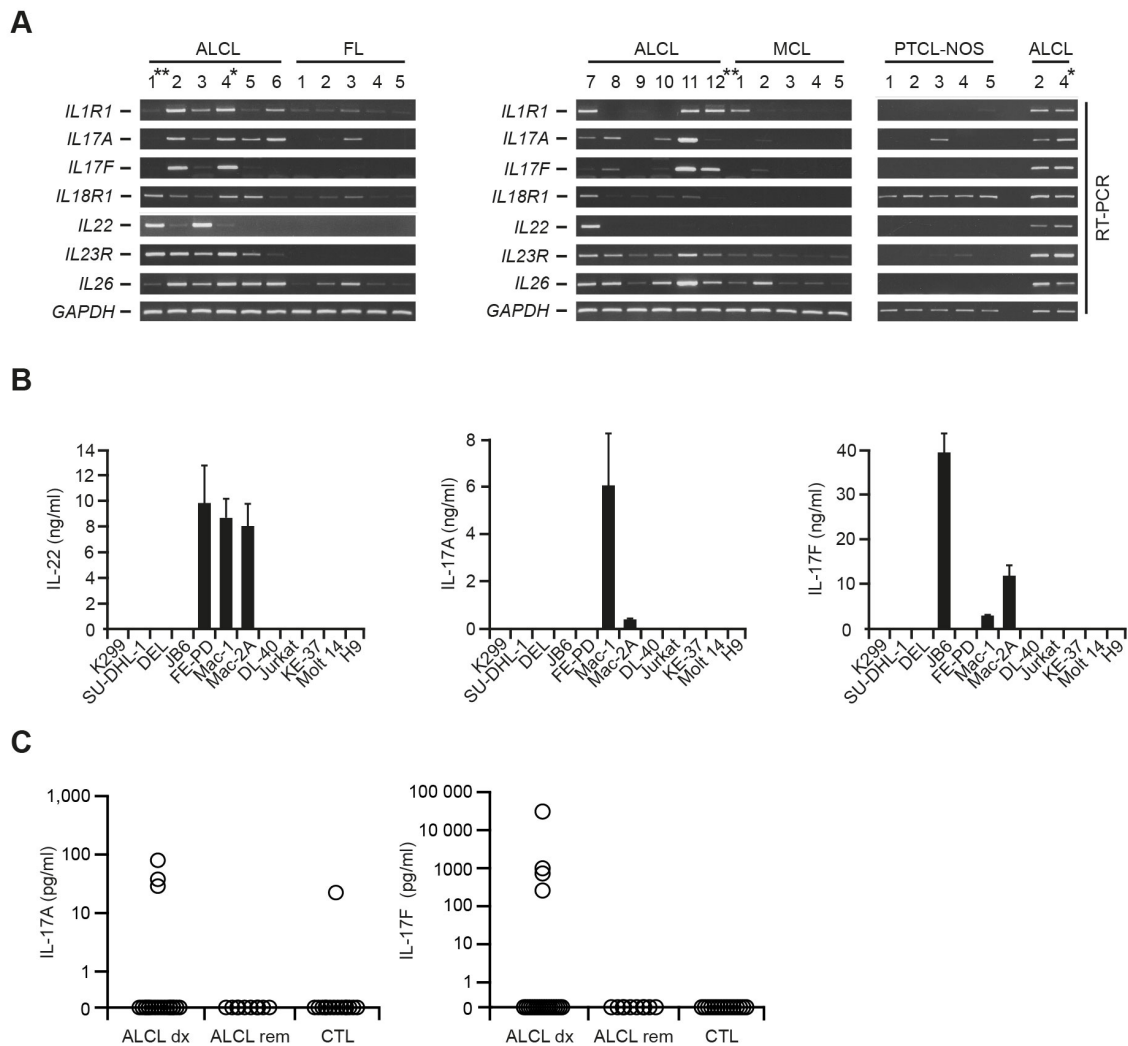

**Supplementary Figure 4.** TH17 / ILC3 genes in ALCL. **(A)** mRNA expression of TH17 / ILC3-associated genes in 12 ALCL (9 ALK<sup>-</sup> ALCL; \*, ALK<sup>+</sup> ALCL; \*\*, ALK status not known), 5 follicular lymphoma, 5 mantle cell lymphoma (MCL) and 5 PTCL-NOS samples as analyzed by RT-PCR. Expression of *GAPDH* was analyzed as a control. **(B)** Secretion of IL-22 (left panel), IL-17A (center) and IL-17F (right) of ALCL and non-ALCL cell lines measured in cell culture supernatants by ELISA. One of three independent experiments is shown. The amount of the respective secreted cytokine is shown in ng/ml. Error bars denote SDs. **(C)** IL-17A (left) and IL-17F (right) levels in pretreatment serum/plasma of children and adolescents with ALK<sup>+</sup> ALCL. Serum/plasma of 21 ALK<sup>+</sup> ALCL patients was analyzed by a cytometric bead array. The respective cytokine levels of patients at initial diagnosis (ALCL dx), patients in remission (ALCL rem) and healthy donors (CTL) are shown in pg/ml on a logarithmic scale.
